# Supplementary material for: Formation of malondialdehyde (MDA), 4-hydroxy-2-hexenal (HHE) and 4-hydroxy-2-nonenal (HNE) in fish and fish oil during dynamic gastrointestinal in vitro digestion
Source: Royal Society of Chemistry journal article supplement (doi:10.1039/c5fo01401h), 2016-01-01

**Supplementary figure.** Relative concentration of MDA (A) and HHE (B) during digestion. For each time point, the relative concentration is calculated from the actual mean aldehyde concentration of the test meal at that point divided by the calculated remaining aldehyde concentration of the test meal at intake (see equation below). The calculated concentrations are based on the patent blue marker, illustrated in **Fig 1**. The end point value for MDA of raw herring (4%), which is above the scale, is 206.

$$\text{Relative concentration}_{t=i} = \frac{\text{Abs (Patent blue)}_{t=i}}{\text{Abs (Patent blue)}_{t=0}} \times \frac{c(\text{test meal})_{t=i}}{c(\text{test meal})_{t=0}}$$

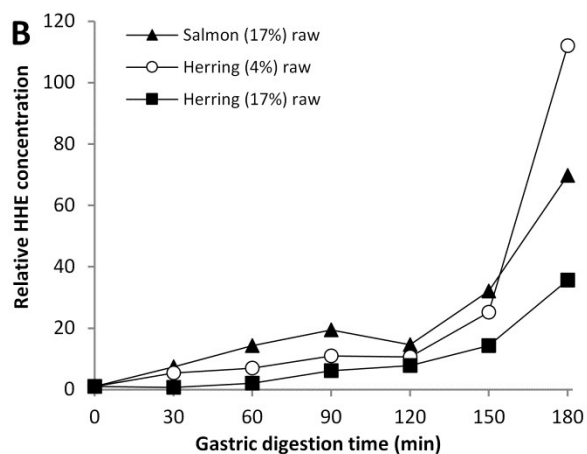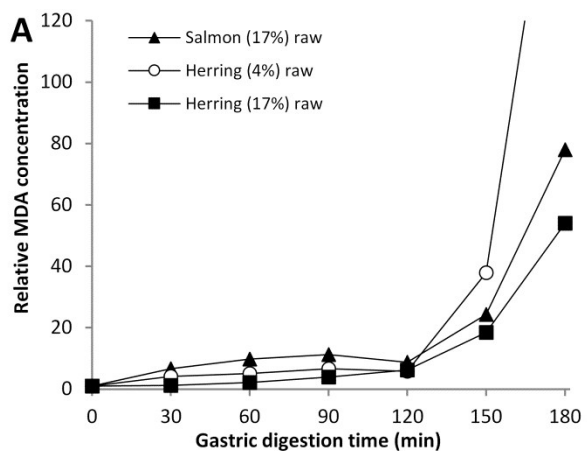

Supplement: c5fo01401h1.pdf [file c5fo01401h1.pdf]
